# Supplementary material for: A method for restoring signals and revealing individual macromolecule states in cryo-ET, REST
Source: PubMed Central journal article supplement (PMC10203133; doi:10.1038/s41467-023-38539-w), 2023-05-22
Supplement: 41467_2023_38539_MOESM1_ESM.pdf [file 41467_2023_38539_MOESM1_ESM.pdf]

1  
2  
3  
4  
5  
6  
7  
8  
9  
10  
11  
12  
13  
14  
15  
16  
17  
18  
19  
20  
21  
22  
23  
24  
25

**Supplementary Information for:**

**REST: A method for restoring signals and revealing individual macromolecule states in cryo-ET**

**Authors:** Haonan Zhang, Yan Li, Yanan Liu, Dongyu Li, Lin Wang, Kai Song, Keyan Bao, Ping Zhu

**Inventory of Supporting Information: Supplementary Figures and Tables**

|                                    |           |
|------------------------------------|-----------|
| <b>Supplementary Fig. 1</b> .....  | <b>2</b>  |
| <b>Supplementary Fig. 2</b> .....  | <b>3</b>  |
| <b>Supplementary Fig. 3</b> .....  | <b>4</b>  |
| <b>Supplementary Fig. 4</b> .....  | <b>5</b>  |
| <b>Supplementary Fig. 5</b> .....  | <b>6</b>  |
| <b>Supplementary Fig. 6</b> .....  | <b>7</b>  |
| <b>Supplementary Fig. 7</b> .....  | <b>8</b>  |
| <b>Supplementary Fig. 8</b> .....  | <b>9</b>  |
| <b>Supplementary Table 1</b> ..... | <b>10</b> |
| <b>Supplementary Table 2</b> ..... | <b>11</b> |
| <b>Supplementary Table 3</b> ..... | <b>12</b> |
| <b>Supplementary Table 4</b> ..... | <b>13</b> |

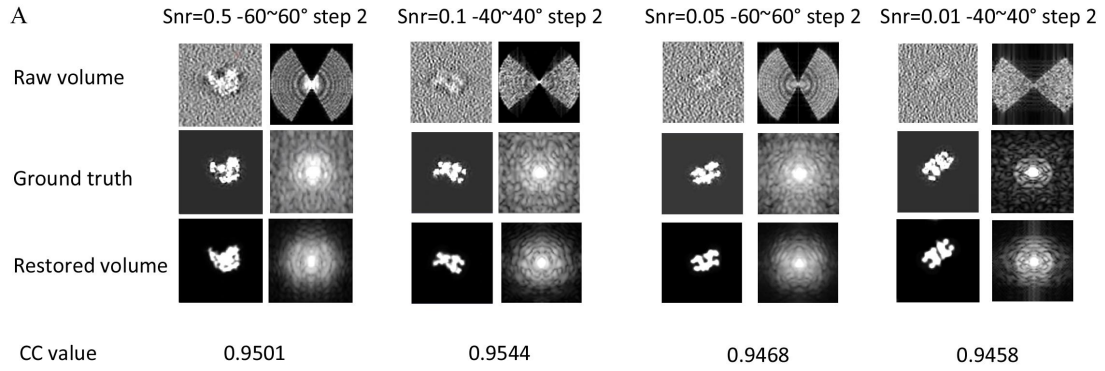

26  
27

28 **Supplementary Fig. 1. The performance of REST restoration under different simulation**  
 29 **conditions.** The volumes of particles with different noise and missing wedge information  
 30 superimposed (raw volume), the generated high-quality particles (ground truth), and the REST  
 31 restored particles (restored volume) are shown in the top, middle and bottom rows respectively.  
 32 The left side of each pair is the XY-slice view, and the right side is the Fourier transform of the  
 33 left particles. The CC value represents the cross coefficient between the restored volume and  
 34 ground truth.

35  
36  
37  
38  
39  
40  
41  
42  
43  
44  
45  
46  
47

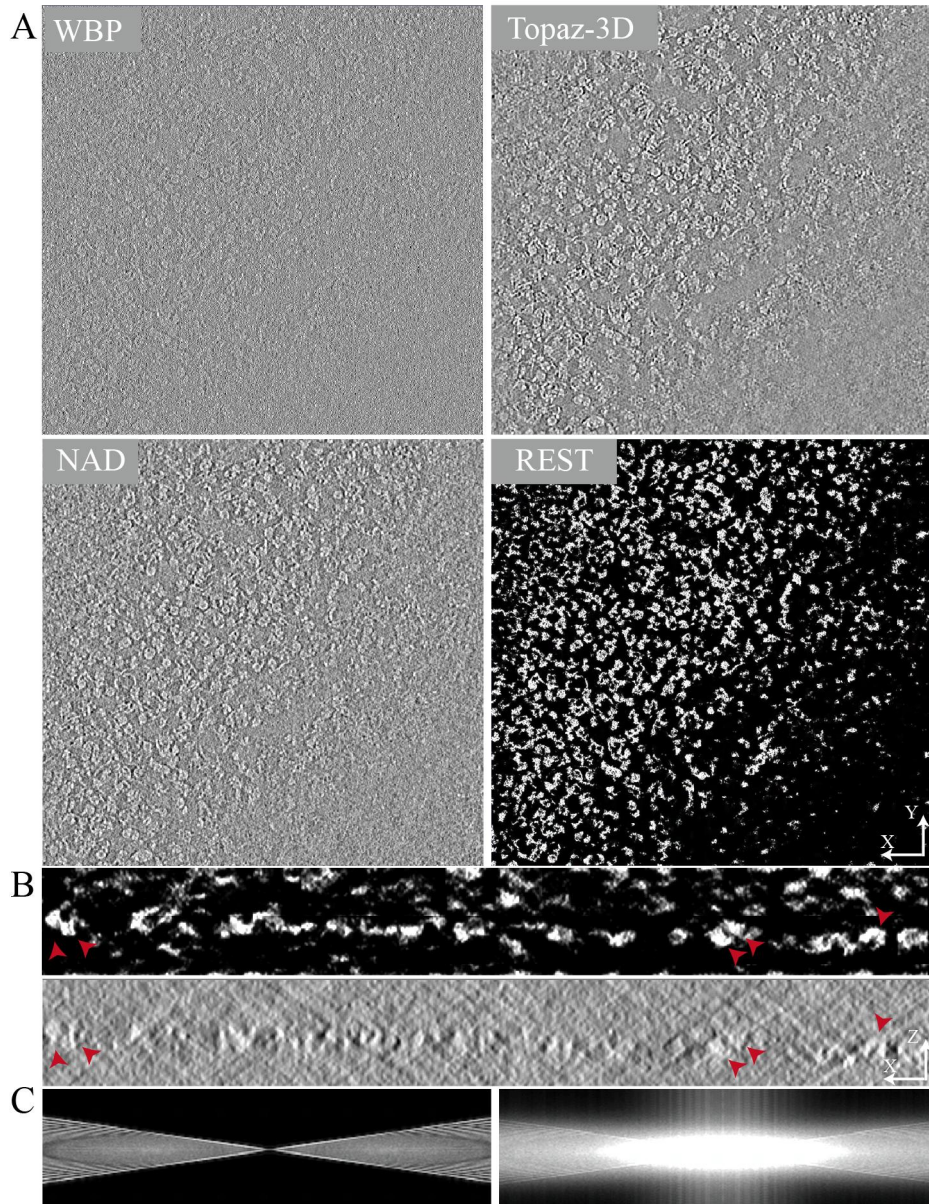

48

49 **Supplementary Fig. 2. Enhancement of the visualization of nucleosomes (EM2) in**

50 **tomograms using REST. (A) Compared with the raw data, the NAD and Topaz-Denoise, REST**

51 **methods can be used to thoroughly remove the noise shown in the tomographic slices. (B) The**

52 **XZ-slice views of the REST-restored tomogram (top) and the denoised tomogram using**

53 **Topaz-Denoise (bottom). (C) Fourier transforms of the raw tomogram (left) and REST-restored**

54 **tomogram (right).**

55

56

57

58

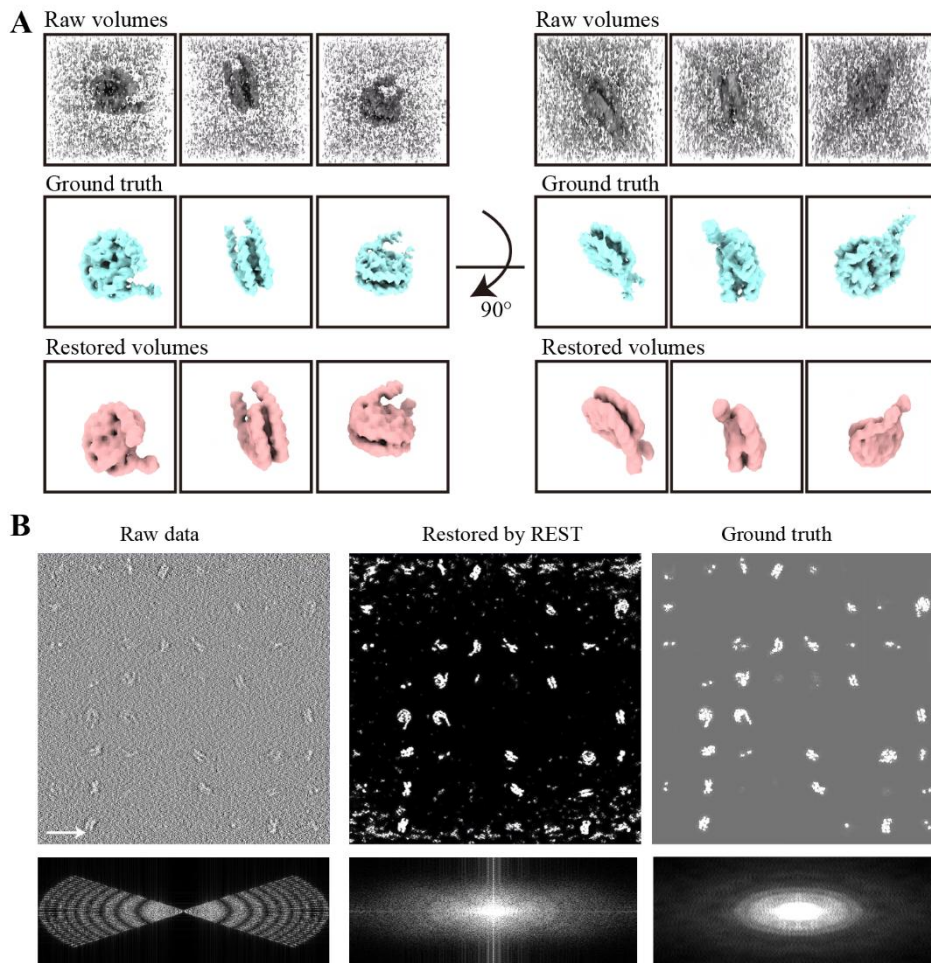

60

61 **Supplementary Fig. 3.** (A) The 3D volume of input particles (raw volumes) (top), the  
 62 corresponding ground truth (middle) and the restored volumes using REST (bottom). (B) Top: The  
 63 XY-slice views of the simulated raw tomogram (left), REST-restored tomogram (middle) and the  
 64 ground truth; Bottom: the corresponding Fourier transforms of the above tomograms.

65

66

67

68

69

70

71

72

73

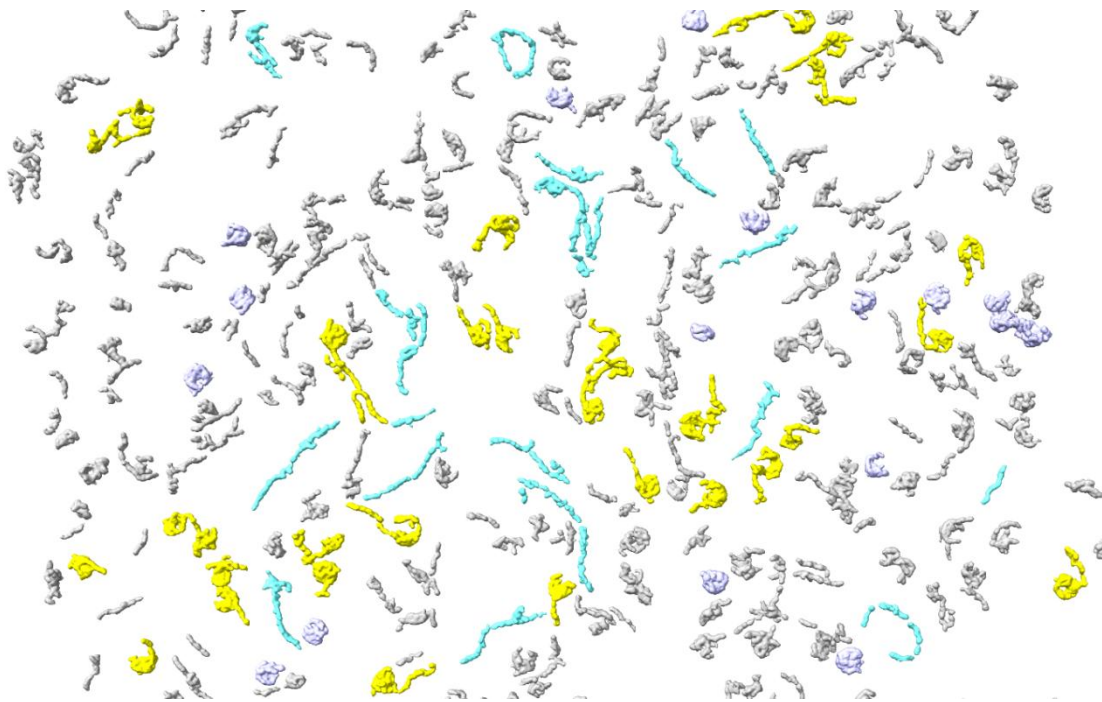

74

75 **Supplementary Fig. 4. The whole tomogram of reconstituted nucleosomes restored by REST.**

76 A portion of nucleosome core particles, nucleosomes with linker DNA and free DNA are shown in

77 purple, yellow and cyan, respectively.

78

79

80

81

82

83

84

85

86

87

88

89

90

91

92

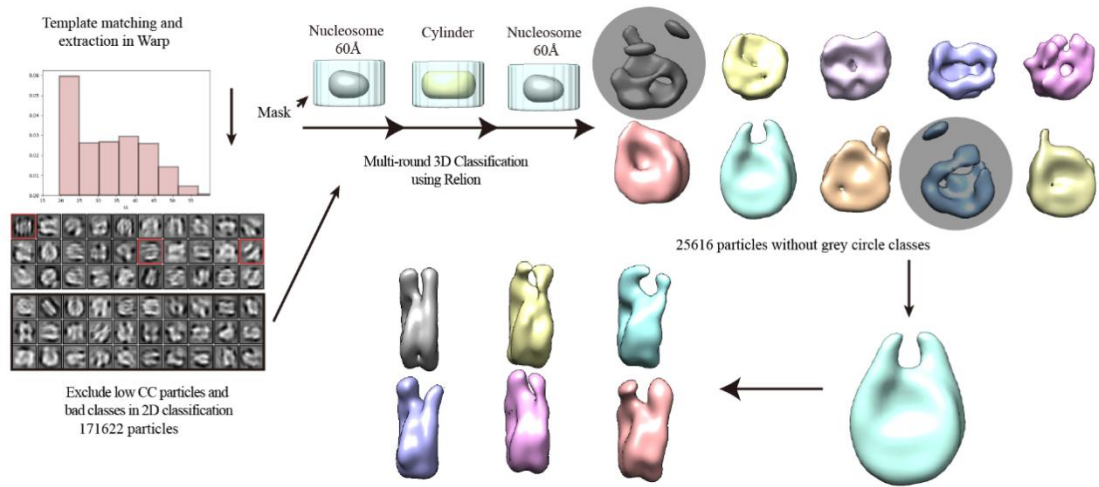

93

94 **Supplementary Fig. 5. Subtomogram averaging workflow of nucleosome structure from frog**

95 **erythrocyte nuclei.**

96

97

98

99

100

101

102

103

104

105

106

107

108

109

110

111

112

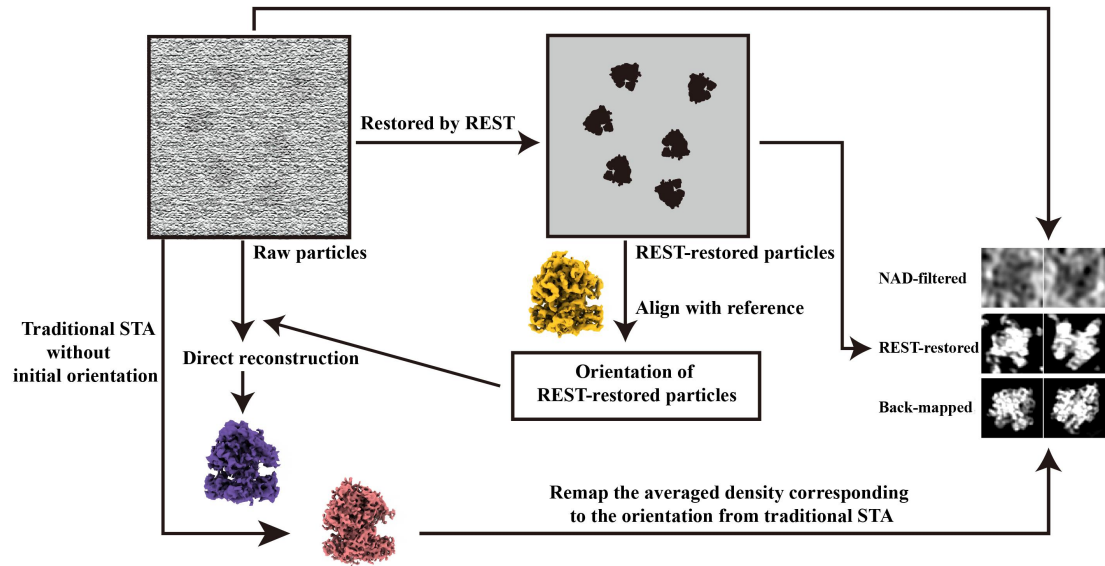

113

114 **Supplementary Fig. 6. The flow chart shows that REST assists in the orientation**  
 115 **determination in STA.**

116

117

118

119

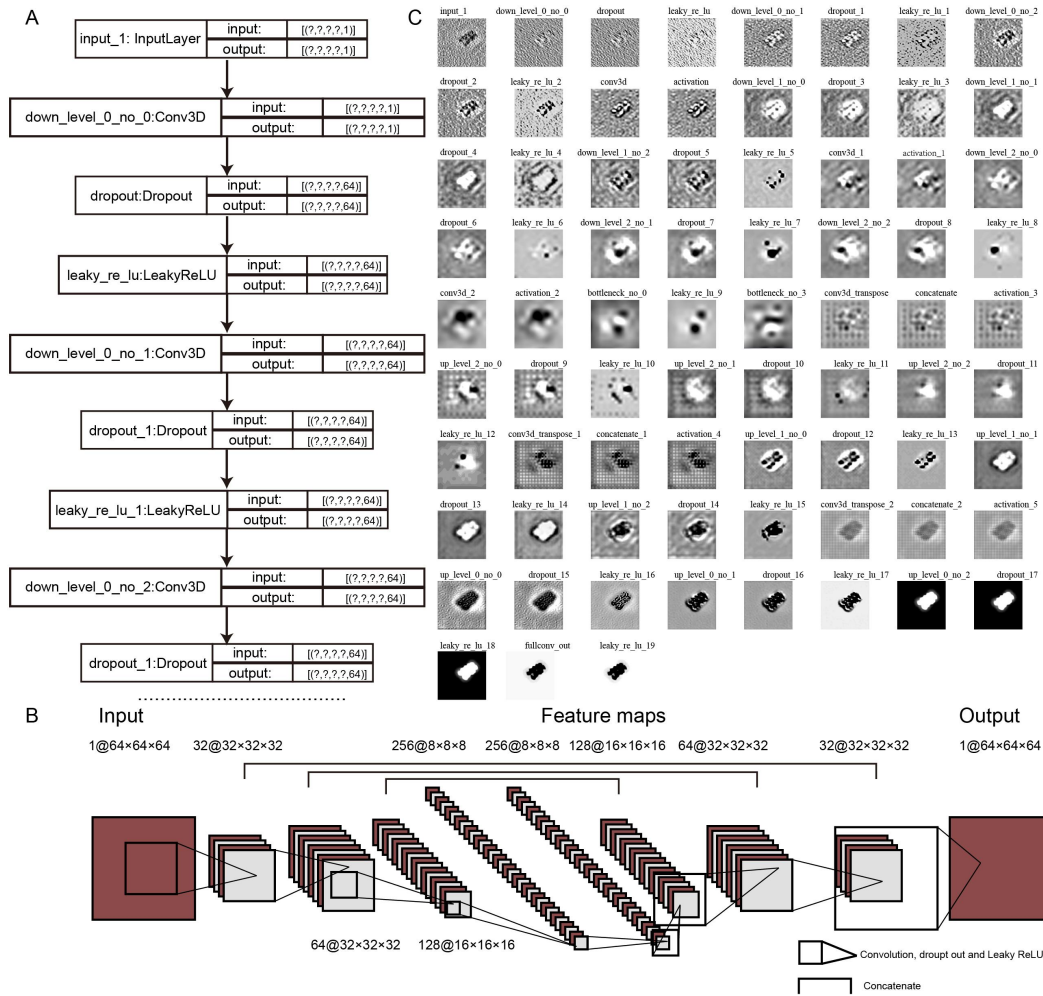

120

121 **Supplementary Fig. 7. The process of restoration by the REST-trained model.**

122 **(A)** The example layers of neural network framework in REST. **(B)** The architecture of neural  
 123 network in REST. **(C)** The slice of the feature map of each layer of the model when  
 124 restoring(predicting) the nucleosome data.

125

126

127

128

129

130

131

132

133



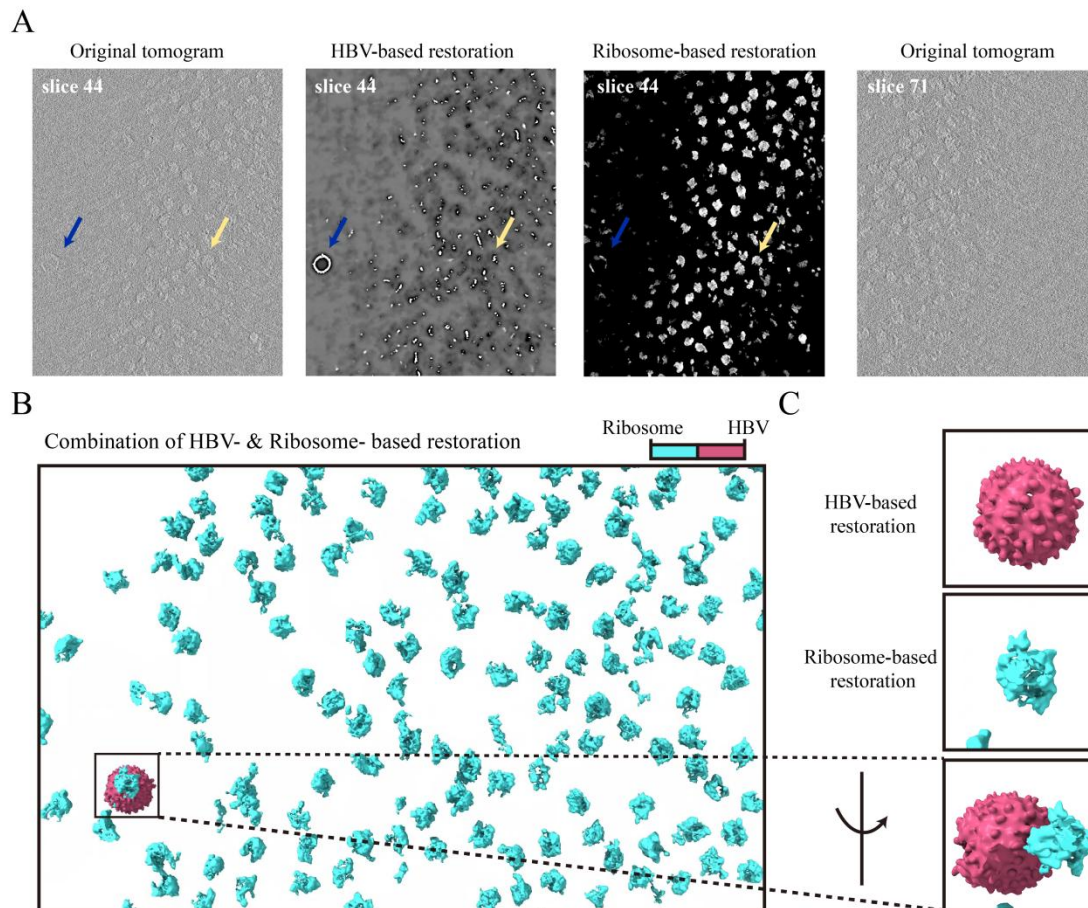

134  
 135 **Supplementary Fig. 8. REST could specifically restore target molecules of interest.** The  
 136 REST restoration of HBV/ribosome mixed sample. **(A)** The left 3 panels: a slice (slice 44) of the  
 137 original tomogram (left) and the corresponding slice of REST restored tomogram based on  
 138 HBV-structure model (middle) and ribosome-structure model (right) respectively. For comparison,  
 139 another slice (slice 71) of the original tomogram is also shown. **(B)** A combined 3D visualization  
 140 of the REST restored tomograms based on HBV-model (pink) and ribosome-model (cyan). **(C)**  
 141 Enlarged view of the black box in (B) showing the HBV-based restoration (top) and the  
 142 ribosome-based restoration (middle) respectively, and the combined view of the boxed area from  
 143 another viewing angle (bottom).

144  
 145  
 146  
 147  
 148  
 149  
 150  
 151  
 152  
 153  
 154

155

156 **Supplementary Table 1: Comparison of denoising methods based on the estimated SNR (in**

157 **dB)**

| SNR<br><i>Method</i> | Dataset        |                  |
|----------------------|----------------|------------------|
|                      | EM1 (ribosome) | EM2 (nucleosome) |
| Raw data             | 0.352          | 0.05             |
| Gauss filter         | 0.419          | —                |
| Wiener filter        | 0.598          | —                |
| NAD                  | 0.652          | 0.14             |
| Topaz-Denoise        | 0.815          | 0.23             |
| REST                 | 7.337          | 9.57             |

158

159

160

161

162

163

164

165

166

167

168

169

170

**Supplementary Table 2: Detailed information of the simulated and real datasets.**

| Details in data collection |        |        |        |        |         |                |        |         |              |
|----------------------------|--------|--------|--------|--------|---------|----------------|--------|---------|--------------|
|                            | SIM1   | SIM2   | SIM3   | SIM4   | SIM5    | EM2            | EM3    | EM4     | EM5          |
| Pixel size (Å)             | 4.44   | 4.44   | 4.44   | 4.44   | 4.44    | 1.36           | 1.36   | 2.73    | 1.36         |
| Defocus(μm)                | -3.5   | -3.5   | -3.5   | -3.5   | -3.5    | -4             | -5     | -5      | -5           |
| Voltage (kV)               | 300    | 300    | 300    | 300    | 300     | 300            | 300    | 300     | 300          |
| SNR                        | 0.5    | 0.1    | 0.05   | 0.01   | 0.05    | —              | —      | —       | —            |
| Angle, step (°)            | ±60, 2 | ±40, 2 | ±60, 2 | ±40, 2 | ±40, 5  | ±50, 3         | ±55, 3 | ±55, 3  | ±50, 3       |
| Specimen                   | 3AFA   | 3AFA   | 3AFA   | 3AFA   | 177 bp* | Core particle* | Mixed* | Nuclei* | Ribosome&HBV |

171 \*Nucleosome sample.

172

173

174

175

176

177

178

179

**Supplementary Table 3: Detailed information of training data used for training model.**

| Detailed parameters of training dataset |                      |        |        |        |        |         |                |        |         |              |           |
|-----------------------------------------|----------------------|--------|--------|--------|--------|---------|----------------|--------|---------|--------------|-----------|
|                                         | EM1                  | SIM1   | SIM2   | SIM3   | SIM4   | SIM5    | EM2            | EM3    | EM4     | EM5          | EM6       |
| Pixel size (Å)                          | 4.34                 | 4.44   | 4.44   | 4.44   | 4.44   | 4.44    | 4.44           | 4.44   | 4.44    | 6.8          | 6.8       |
| Defocus(μm)                             | -                    | -3.5   | -3.5   | -3.5   | -3.5   | -3.5    | -4             | -5     | -5      | -5           | -5        |
| Voltage (kV)                            | -                    | 300    | 300    | 300    | 300    | 300     | 300            | 300    | 300     | 300          | 300       |
| SNR                                     | -                    | 0.5    | 0.1    | 0.05   | 0.01   | 0.05    | 0.05           | 0.05   | 0.02    | 0.01         | 0.01      |
| Angle, step (°)                         | -                    | ±60, 2 | ±40, 2 | ±60, 2 | ±40, 2 | ±40, 5  | ±50, 3         | ±55, 3 | ±55, 3  | ±50, 3       | ±60, 3    |
| Strategy                                | 1                    | 2      | 2      | 2      | 2      | 2       | 2              | 2      | 2       | 2            | 2         |
| Sample size                             | 2578                 | 3000   | 3000   | 3000   | 3000   | 3000    | 3000           | 3000   | 3000    | 3000         | 3000      |
| Ground truth                            | Averaged<br>ribosome | 3AFA   | 3AFA   | 3AFA   | 3AFA   | 177 bp* | Core particle* | Mixed* | Nuclei* | Ribosome&HBV | EMD-11999 |

180

181

182

183

184 **Supplementary Table 4: Cross coefficient (CC) between the T-I volume and restored volume**

185 **shown in Fig. 5.**

|            | Particle type             |                             |
|------------|---------------------------|-----------------------------|
|            | Nucleosome core particles | Nucleosomes with linker DNA |
| Particle 1 | 0.81                      | 0.64                        |
| Particle 2 | 0.84                      | 0.89                        |
| Particle 3 | 0.78                      | 0.72                        |
| Particle 4 | 0.77                      | 0.76                        |
| Particle 5 | 0.78                      | 0.57                        |
| Particle 6 | 0.70                      | 0.72                        |

186

187
